# Supplementary material for: PhoCoil: An Injectable and Photodegradable Single-component Recombinant Protein Hydrogel for Localized Therapeutic Cell Delivery
Source: PubMed Central journal article supplement — bioRxiv. 2024 May 10:2024.05.07.592971. Preprint. [Version 1] doi: 10.1101/2024.05.07.592971 (PMC11100756; doi:10.1101/2024.05.07.592971), 2024-05-10
Supplement: media-1.pdf [file media-1.pdf]

## Supplementary Materials

### PhoCoil Amino Acid Sequence

Coil domain PhoCl2c XTEN GS Linker RGD 6X HisTag

MRGSHHHHHHEFGRGDSVDGSGSGSGSGSGSAPQMLRELQETNAALQDVRELLRQAVKEITFLK  
NTVMESDASGSGSGSGSGSGLDGPAGSPTSTEEGTSESATPESGPGTSTEPSEGSAPGSPAGS  
PTSTEEGTSTEPSEGSAPGTSTEPSEGSAKLEFVIPDYFKQSFPEGYSWERSMTYEDGGICIATNDIT  
MEGDSFINKIHFGQTNFPPNGPVMQKRTVGWEASTEKMYERDGLKGDVVKMKLLKGGGHYRGDY  
RTTYKVKQKPKLPDCHFVDHRIEILSHDKDYNKVKLYEHAVAKTSTDSMDELYKGGSGGMVSKGEE  
TITSVIKPD MNKLRMEGNVNGHAFVIEGEGSGKPFEGIQTIDLEVKEGAPLPFAYDILTTAFHYGNRV  
FTKYPRGGGQLPGTSESATPESGPGSEPATSGSETPGSEPATSGSETPGSPAGSPTSTEEGTSESA  
TPESGPGTSTEPSEGSAPLDGSGSGSGSGSGSAPQMLRELQETNAALQDVRELLRQAVKEITFLK  
NTVMESDASGSGSGSGSGSGSGRGRDSSH HHHHH

### PhoCoil Nucleotide Sequence (5' → 3')

ATGCGTGGCAGCCACCATCACCATCACCATGAGTTTGGCCGCGGAGATTCAGTAGATGGTTCGG  
GCTCTGGATCAGGTTCCGGTTCGGGTAGTGGGCCCCACAGATGCTTCGCGAGCTCCAAGAGA  
CAAACGCGGCCCTGCAAGACGTACGTGAGCTTCTCCGCCAGGCAGTAAAGAAATTACATTTCT  
GAAGAATACTGTTATGGAAAGCGACGCCTCAGGTTCCGGTTCGGGTTCAGGCAGCGGCTCCGG  
CTCATTGGATGGGTCCGACAGGTAGTCCAACGAGTACCGAGGAAGGTACCTCAGAAAGCGC  
CACTCCAGAATCAGGTCCAGGTACAAGCACTGAGCCTTCGGAAGGGTCTGCCCCCGGCTCCCC  
AGCGGGCAGTCCCACGTCAACAGAGGAAGGCACGAGTACTGAGCCTTCAGAAGGGTTCAGCTCC  
AGGGACATCAACGGAACCTAGTGAAGGCAGCGCCAAACTGGAATTCGTGATCCCTGACTACTTC  
AAGCAGAGCTTCCCCGAGGGCTACAGCTGGGAGCGCAGCATGACCTACGAGGACGGCGGCAT  
CTGCATCGCCACCAACGACATACAATGGAGGGGGACAGCTTCATCAACAAGATCCACTTCCAG  
GGCACGAACCTCCCCCAACGGCCCCGTGATGCAGAAGAGGACCGTGGGCTGGGAGGCCAG  
CACCGAGAAGATGTACGAGCGCGACGGCGTGCTGAAGGGCGACGTGAAGATGAAGCTGCTGCT  
GAAGGGCGGCGGCCACTATCGCGGCGACTACCGCACCACCTACAAGGTCAAGCAGAAGCCCG  
TAAAGCTGCCCGACTGCCACTTCGTGGACCACCGCATCGAGATCCTGAGCCACGACAAGGACT  
ACAACAAGGTGAAGCTGTACGAGCACGCCGTGGCCAAGACTTCCACCGACAGCATGGACGAGC  
TGTACAAGGGTGGCAGCGGTGGCATGGTGAAGGCGAGGAGACCATTACAAGCGTGATCA  
AGCCTGACATGAAGAACAAGCTGCGCATGGAGGGCAACGTGAACGGCCACGCCTTCGTGATCG  
AGGGCGAGGGCAGCGGCAAGCCCTTCGAGGGCATCCAGACGATTGATTTGGAGGTGAAGGAG  
GGCGCCCCGCTGCCCTTCGCCTACGACATCCTGACCACCGCCTTCCACTACGGCAACCGCGTG  
TTCACCAAGTACCCACGGGGCGGCGGCCAATTGCCGGGAACATCAGAATCTGCTACACCAGAA  
TCGGGCCCTGGGTTCAGAACC GGCCACTTCGGGTTTCAGAAACACCTGGCAGTGAACCTGCTACT  
AGTGGCTCGGAAACCCAGGGTCCCCAGCCGGTTCCTACCTCGACAGAAGAGGGTACATCG  
GAGTCCGCGACACCTGAATCAGGGCCAGGAACAAGCACAGAACCGTTCGGAAGGGTCTGCCCT  
CTGGATGGAAGCGGTTCCAGGCTCGGGTTCGGGTAGCGGTTCCGGCGCACCCAGATGTTGCG  
CGAGCTTCAAGAGACTAACGCAGCCTTACAAGACGTACGCGAGCTGCTGCGCCAGGCCGTGAA  
AGAAATTACCTTCTTAAAGAATACGGTTATGGAAAGTGACGCCTCAGGGAGTGGTAGTGTTCCG  
GGCAGCGGGTTCAGGCTCTGGCCGCGGCGATTACACCATCACCATCACCATTA

Note: PhoCoil plasmid is available at Addgene (ID 220444).

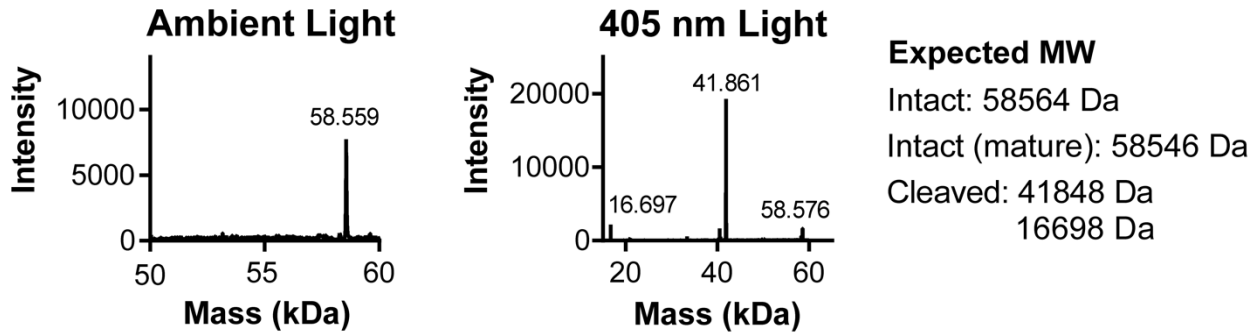

**Supplementary Fig. 1. Mass spectrometry of PhoCoil before and after 405 nm light exposure.** In ambient light conditions (left), the main peak corresponds to intact PhoCoil with a mature chromophore. The actual mass is ~13 Da higher than the mass expected from the primary amino acid sequence alone when accounting for a -18 Da shift for chromophore maturation. However, this +13 Da shift matches precedent from the coiled-coiled XTEN gels that this work was based on (1). After exposure to 405 nm light (10 mW cm<sup>-2</sup> for 60 min), the main peak corresponds to the larger fragment of cleaved PhoCoil (which retains the +13 Da mass shift from expected). The two additional peaks correspond to the smaller fragment of cleaved PhoCoil (left) and residual intact PhoCoil with an immature chromophore (right), indicated by a +18 Da shift from mature PhoCoil.

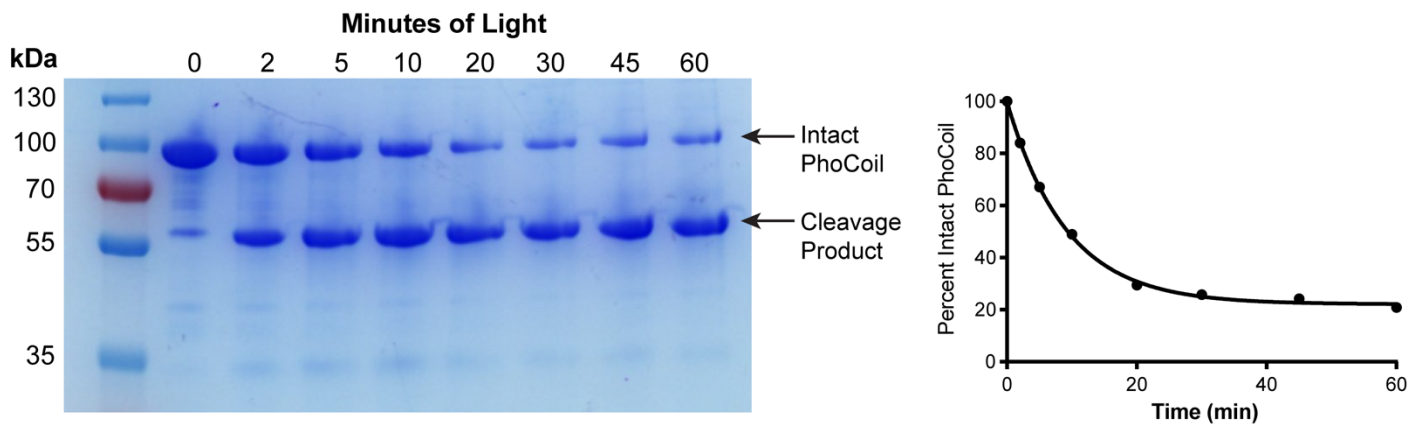

**Supplementary Fig. 2. Analysis of PhoCoil cleavage in solution.** A 1 mg mL<sup>-1</sup> solution of PhoCoil, too dilute to form a gel, was subjected to 10 mW cm<sup>-2</sup> of 405 nm light for 0-60 min. Samples were obtained at various intervals and run on SDS-PAGE with reducing and denaturing conditions. The acrylamide gel was stained with Coomassie blue to visualize protein bands. Note that it is expected that PhoCoil proteins run larger than their actual size on SDS-PAGE due to the inclusion of XTEN sequences, which lack hydrophobic amino acids and are expected to bind SDS less strongly because of this (2). The efficiency of PhoCoil cleavage was quantified using ImageJ to calculate the intensity of the intact PhoCoil bands in each sample. The percentage of intact PhoCoil remaining was determined by dividing each intensity by the original band intensity at 0 min, and the data was fit to an exponential decay formula. Residual intact PhoCoil is expected to be mostly in an immature state, where a lack of chromophore formation prevents cleavage from occurring.

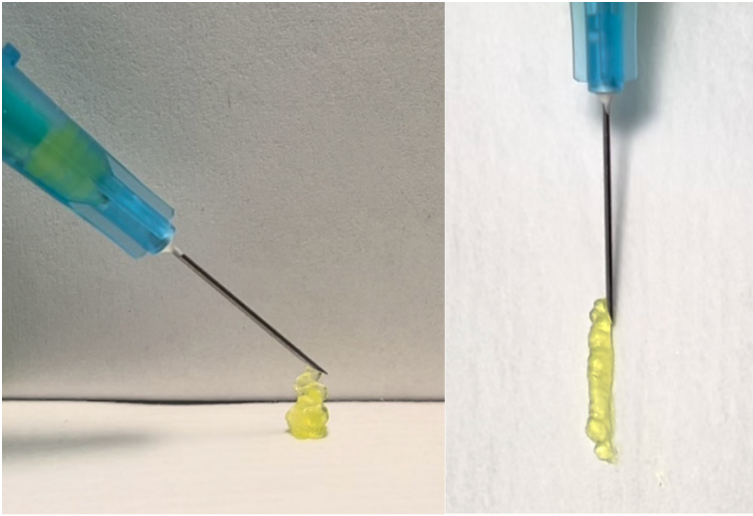

**Supplementary Fig. 3. Injection of PhoCoil gel.** 10 wt% gel was loaded into a 1 mL-syringe with a 25 gauge, 5/8 in needle. Injection required little pressure and the material retained gel-like properties post-injection as visualized.

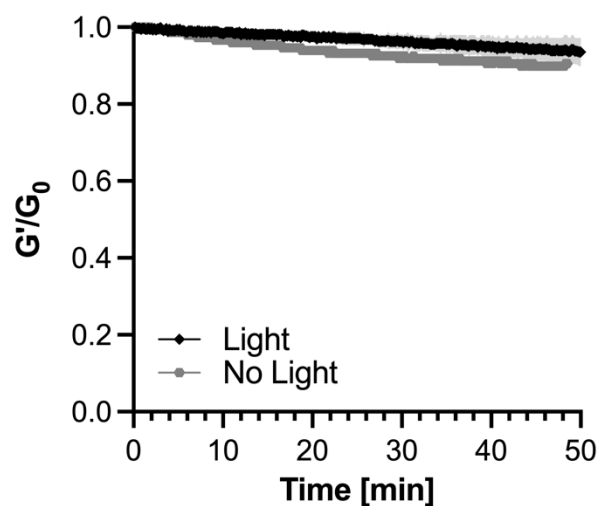

**Supplementary Fig. 4. Coil gel stiffness in response to light.** Coil gels, which are not designed to be light-responsive, were tested for potential photsoftening during an oscillatory rheology time sweep. Rheology was conducted at 5% strain and  $10 \text{ rad s}^{-1}$  with 405nm light intensity set to  $10 \text{ mW cm}^{-2}$  at the gel.  $G'_0$  was defined as the storage modulus immediately before light exposure was initiated. 10 wt% gels were used, with three independent gels measured for the light condition, and one for the no light condition. Data is presented as the mean (line)  $\pm$  SD (shaded area) for the light condition.

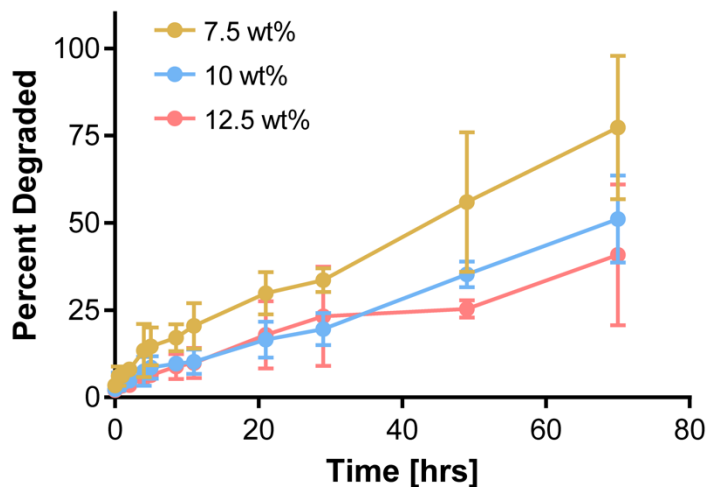

**Supplementary Fig. 5. Extended PhoCoil bulk gel degradation in ambient light.** 25  $\mu$ L gels were covered with PBS and kept in ambient light. PBS was sampled at various intervals over 3 days and analyzed by BCA assay to determine protein content as a measure of the percentage of gel degraded at each time point. Three independent gels were tested for each weight percentage. Data shown are mean  $\pm$  SD.

| Gel Weight Percentage (wt%) | 405 nm Light Exposure (min) | Half-life (hrs) |
|-----------------------------|-----------------------------|-----------------|
| 7.5                         | 0                           | 44 ± 16         |
|                             | 30                          | 6 ± 2           |
|                             | 60                          | 2.2 ± 0.3       |
|                             | 90                          | 2.4 ± 0.8       |
| 10                          | 0                           | 82 ± 32         |
|                             | 30                          | 7.0 ± 0.6       |
|                             | 60                          | 5.2 ± 0.5       |
|                             | 90                          | 3 ± 1           |
| 12.5                        | 0                           | 112 ± 51        |
|                             | 30                          | 9 ± 2           |
|                             | 60                          | 5.1 ± 0.3       |
|                             | 90                          | 4.0 ± 0.9       |

**Supplementary Table 1. PhoCoil bulk degradation half-lives.** Gel degradation curves in Figure 4B were used to calculate degradation half-lives for each condition. These values represent degradation of 25  $\mu$ L gels covered with PBS in microcentrifuge tubes. Data shown are mean  $\pm$  SD.

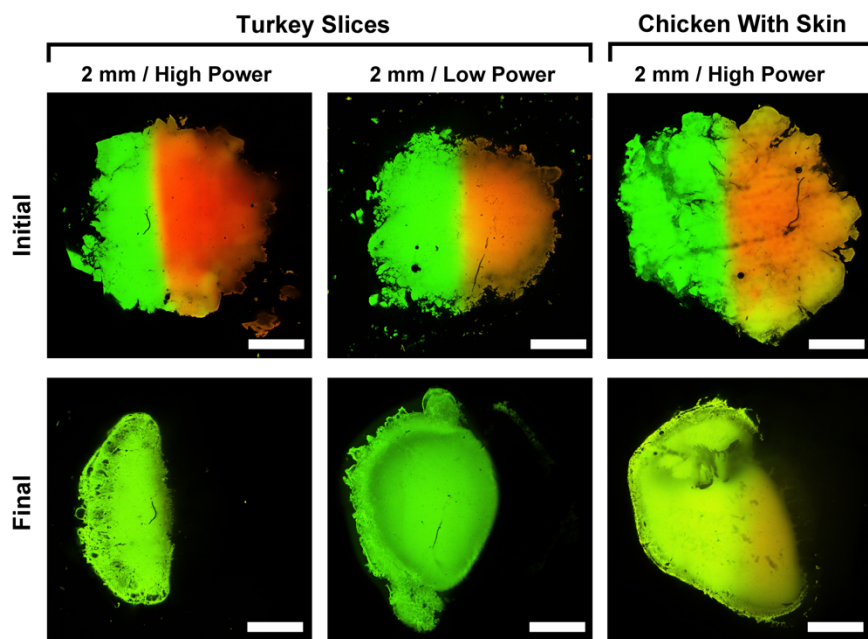

**Supplementary Fig. 6. Extended *ex vivo* photodegradation.** The left half of the gels was covered with a photomask, and the entire gel was placed under 2 mm of deli turkey or chicken with skin on. Gels were exposed to 405 nm light, for short periods at high power and long periods at low power, confocal imaged to visualize the pattern (initial), and left to degrade in excess PBS prior to final confocal imaging.



## Supplementary References

1. J. I. Bennett, M. O. Boit, N. E. Gregorio, F. Zhang, R. D. Kibler, J. W. Hoye, O. Prado, P. B. Rapp, C. E. Murry, K. R. Stevens, C. A. DeForest, Genetically Encoded XTEN-based Hydrogels with Tunable Viscoelasticity and Biodegradability for Injectable Cell Therapies. *Advanced Science*, 2301708 (2024).
2. V. N. Podust, S. Balan, B.-C. Sim, M. P. Coyle, U. Ernst, R. T. Peters, V. Schellenberger, Extension of in vivo half-life of biologically active molecules by XTEN protein polymers. *Journal of Controlled Release* **240**, 52–66 (2016).
